# Supplementary material
Source: Springer Nature journal article supplement (https://www.springermedizin.de/resource/supplementary/12947_2013_494_MOESM4_ESM.pdf/9555886)

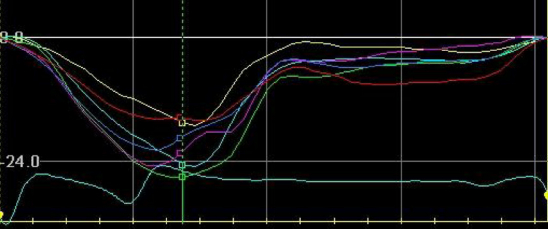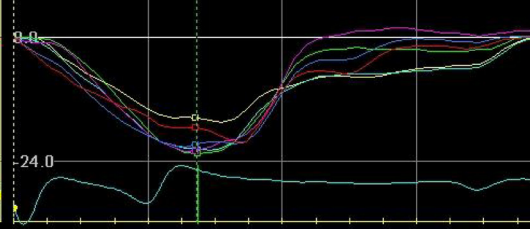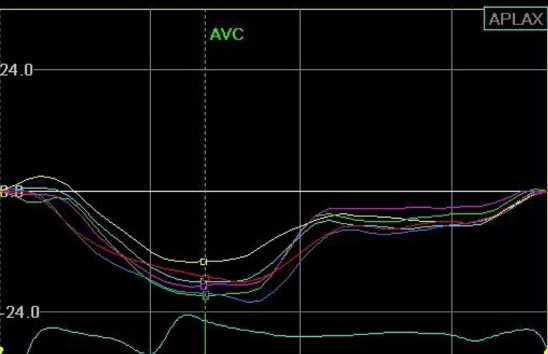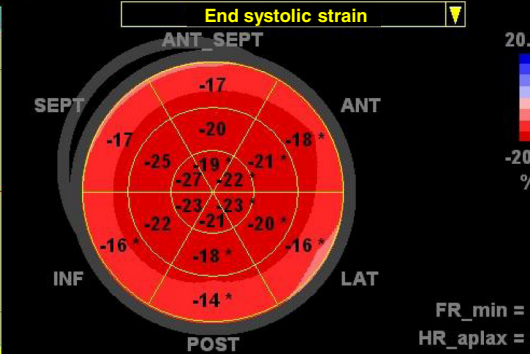

Baseline

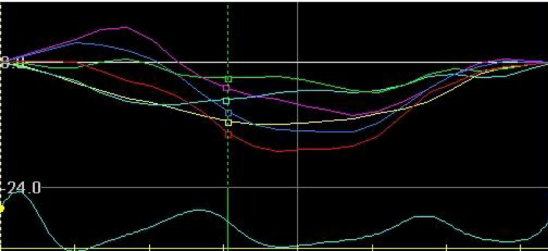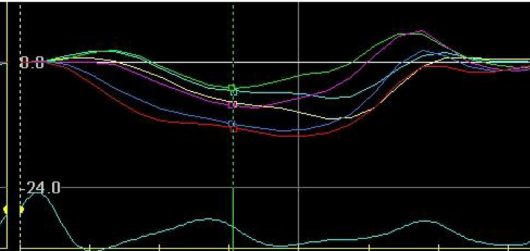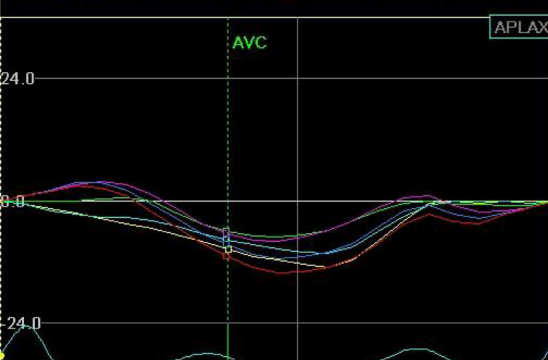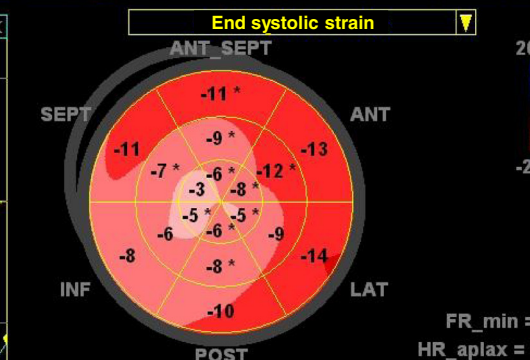

After TIC

Supplement: MOESM4 [file 9555886]
